# Supplementary material
Source: PubMed Central journal article supplement (PMC3799846)

## SUPPORTING INFORMATION

### **Genetic Analysis of *Agrobacterium tumefaciens* Unipolar Polysaccharide Production Reveals Complex Integrated Control of the Motile-to-Sessile Switch**

Jing Xu<sup>1</sup>, Jinwoo Kim<sup>2</sup>, Benjamin J. Koestler<sup>3</sup>, Jeong-Hyeon Choi<sup>4†</sup>

Christopher M. Waters<sup>3</sup> and Clay Fuqua<sup>1\*</sup>

<sup>1</sup>Department of Biology, Indiana University, Bloomington, IN 47405

<sup>2</sup>Division of Applied Life Science, Gyeongsang National University, Jinju 660-  
701, Korea

<sup>3</sup>Department of Microbiology and Molecular Genetics, Michigan State University,  
East Lansing, MI 48824

<sup>4</sup> Center for Genomics and Bioinformatics, Indiana University, Bloomington, IN

Running Title: *Agrobacterium tumefaciens* unipolar polysaccharide control

Keywords: Attachment, Unipolar polysaccharide, Cellulose, Congo Red, VisN-  
VisR, Biofilm, Motility, c-di-GMP

**Table S1. Genes decreased in the  $\Delta visR$  mutant as determined by DNA microarray expression profiling ( $\log_2 FC < -0.6$ ,  $P < 0.05$ )**

| <b>Gene ID</b> | <b>Gene</b> | <b>Product</b>                                        | <b><math>\log_2 FC</math></b> | <b>P value</b> |
|----------------|-------------|-------------------------------------------------------|-------------------------------|----------------|
| Atu0574        | <i>flgE</i> | flagellar hook protein FlgE                           | -5.86                         | <0.01          |
| Atu0573        | -           | transcriptional regulator                             | -5.12                         | <0.01          |
| Atu0555        | <i>flgB</i> | flagellar basal body rod protein FlgB                 | -5.10                         | <0.01          |
| Atu0562        | <i>fliN</i> | flagellar motor switch protein FliN                   | -4.87                         | <0.01          |
| Atu0525        | <i>agrR</i> | LuxR family transcriptional regulator                 | -4.48                         | <0.01          |
| Atu0543        | <i>flaB</i> | hypothetical protein                                  | -4.44                         | <0.01          |
| Atu0561        | <i>fliM</i> | flagellar motor switch protein                        | -4.39                         | <0.01          |
| Atu0575        | <i>flgK</i> | flagellar hook-associated protein FlgK                | -4.35                         | <0.01          |
| Atu0551        | <i>flgA</i> | flagellar basal body P-ring biosynthesis protein FlgA | -4.12                         | <0.01          |
| Atu0560        | <i>motA</i> | flagellar motor protein MotA                          | -3.96                         | <0.01          |
| Atu0552        | <i>flgG</i> | flagellar basal body rod protein FlgG                 | -3.92                         | <0.01          |
| Atu0520        | <i>cheY</i> | chemotaxis receiver protein                           | -3.83                         | <0.01          |
| Atu0554        | <i>flgC</i> | flagellar basal body rod protein FlgC                 | -3.73                         | <0.01          |
| Atu0576        | <i>flgL</i> | flagellar hook-associated protein FlgL                | -3.55                         | <0.01          |
| Atu0571        | <i>motD</i> | chemotaxis MotD protein                               | -3.40                         | <0.01          |
| Atu0515        | -           | hypothetical protein                                  | -3.39                         | <0.01          |
| Atu0563        | <i>fliG</i> | flagellar motor switch protein G                      | -3.37                         | <0.01          |
| Atu0844        | -           | hypothetical protein                                  | -3.30                         | 0.01           |
| Atu0519        | <i>cheB</i> | chemotaxis-specific methyl-esterase                   | -3.26                         | <0.01          |
| Atu0569        | <i>motB</i> | flagellar motor protein MotB                          | -3.25                         | <0.01          |
| Atu0568        | -           | hypothetical protein                                  | -3.19                         | <0.01          |
| Atu0557        | <i>fliI</i> | flagellum-specific ATP synthase                       | -3.17                         | <0.01          |
| Atu0549        | -           | hypothetical protein                                  | -3.14                         | 0.01           |
| Atu0585        | -           | hypothetical protein                                  | -3.09                         | 0.01           |
| Atu0558        | <i>flgF</i> | flagellar basal body rod protein FlgF                 | -3.07                         | <0.01          |
| Atu0545        | <i>flaA</i> | flagella associated protein                           | -3.07                         | <0.01          |
| Atu0516        | <i>cheY</i> | chemotaxis receiver protein                           | -3.04                         | <0.01          |
| Atu0892        | -           | hypothetical protein                                  | -3.01                         | <0.01          |
| Atu0542        | <i>fla</i>  | flagellin                                             | -2.84                         | <0.01          |
| Atu0514        | -           | methyl-accepting chemotaxis protein                   | -2.81                         | <0.01          |
| Atu0566        | -           | hypothetical protein                                  | -2.78                         | <0.01          |
| Atu4345        | -           | hypothetical protein                                  | -2.78                         | <0.01          |
| Atu0584        | -           | hypothetical protein                                  | -2.68                         | <0.01          |
| Atu0517        | <i>cheA</i> | chemotaxis protein histidine kinase                   | -2.68                         | <0.01          |
| Atu0577        | <i>flaF</i> | flagellar biosynthesis regulatory protein             | -2.61                         | <0.01          |
| <b>Gene ID</b> | <b>Gene</b> | <b>Product</b>                                        | <b><math>\log_2 FC</math></b> | <b>P value</b> |

|                |             |                                                    |                           |                |
|----------------|-------------|----------------------------------------------------|---------------------------|----------------|
| Atu4054        | <i>exoL</i> | succinoglycan biosynthesis protein                 | -2.60                     | <0.01          |
| Atu0553        | <i>fliE</i> | flagellar hook-basal body protein FliE             | -2.53                     | 0.01           |
| Atu4736        | -           | methyl-accepting chemotaxis protein                | -2.52                     | <0.01          |
| Atu3977        | <i>ina</i>  | ice nucleation-like protein                        | -2.48                     | <0.01          |
| Atu0579        | <i>flgD</i> | flagellar basal body rod modification protein      | -2.46                     | <0.01          |
| Atu4050        | <i>exoN</i> | UTP-glucose-1-phosphate uridylyltransferase        | -2.45                     | 0.01           |
| Atu0565        | -           | hypothetical protein                               | -2.43                     | <0.01          |
| Atu0521        | <i>cheD</i> | chemoreceptor glutamine deamidase CheD             | -2.42                     | <0.01          |
| Atu0567        | <i>flaD</i> | flagellin protein FlaD                             | -2.40                     | 0.02           |
| Atu4049        | <i>exoP</i> | exopolysaccharide polymerization/transport protein | -2.39                     | <0.01          |
| Atu0522        | -           | hypothetical protein                               | -2.39                     | <0.01          |
| Atu0700        | -           | two component sensor kinase                        | -2.35                     | <0.01          |
| Atu0518        | <i>cheR</i> | chemotaxis methyltransferase                       | -2.33                     | <0.01          |
| Atu1559        | -           | hypothetical protein                               | -2.27                     | <0.01          |
| Atu1233        | -           | hypothetical protein                               | -2.26                     | 0.04           |
| Atu3725        | -           | methyl-accepting chemotaxis protein                | -2.25                     | <0.01          |
| Atu0556        | -           | hypothetical protein                               | -2.20                     | <0.01          |
| Atu2173        | <i>mcpA</i> | methyl-accepting chemotaxis protein                | -2.13                     | <0.01          |
| Atu0653        | -           | hypothetical protein                               | -2.12                     | <0.01          |
| Atu3327        | <i>exoY</i> | succinoglycan exopolysaccharide synthesis protein  | -2.10                     | <0.01          |
| Atu0578        | <i>flbT</i> | flagellar biosynthesis repressor FlbT              | -2.09                     | <0.01          |
| Atu5089        | -           | hypothetical protein                               | -2.09                     | <0.01          |
| Atu4344        | <i>clpB</i> | ATP-dependent Clp protease, ATP-binding subunit    | -2.08                     | <0.01          |
| Atu0373        | -           | methyl-accepting chemotaxis protein                | -2.06                     | <0.01          |
| Atu4052        | <i>exoM</i> | UDP-hexose transferase                             | -2.00                     | <0.01          |
| Atu2075        | <i>cheW</i> | chemotaxis protein                                 | -1.95                     | 0.01           |
| Atu4347        | -           | hypothetical protein                               | -1.95                     | <0.01          |
| Atu4348        | <i>vgrG</i> | VgrG protein                                       | -1.92                     | <0.01          |
| Atu4349        | -           | hypothetical protein                               | -1.91                     | 0.01           |
| Atu4346        | -           | hypothetical protein                               | -1.90                     | 0.03           |
| Atu4056        | <i>exoH</i> | succinoglycan biosynthesis protein                 | -1.86                     | 0.04           |
| Atu4341        | <i>impC</i> | hypothetical protein                               | -1.85                     | <0.01          |
| Atu4343        | <i>impA</i> | hypothetical protein                               | -1.79                     | 0.02           |
| Atu4340        | <i>impD</i> | hypothetical protein                               | -1.78                     | 0.02           |
| Atu0547        | <i>fliL</i> | flagellar protein                                  | -1.59                     | 0.02           |
| Atu3642        | <i>vgrG</i> | vgrG protein                                       | -1.59                     | 0.01           |
| Atu3564        | <i>exsH</i> | endo-1,3-1,4-beta-glycanase                        | -1.58                     | <0.01          |
| Atu1601        | <i>hemN</i> | coproporphyrinogen III oxidase                     | -1.57                     | 0.05           |
| <b>Gene ID</b> | <b>Gene</b> | <b>Product</b>                                     | <b>log<sub>2</sub> FC</b> | <b>P value</b> |

|         |             |                                                       |       |       |
|---------|-------------|-------------------------------------------------------|-------|-------|
| Atu0550 | <i>flgI</i> | flagellar basal body P-ring protein                   | -1.56 | 0.01  |
| Atu0646 | <i>mcpA</i> | methyl-accepting chemotaxis protein A                 | -1.50 | 0.03  |
| Atu4337 | <i>impG</i> | hypothetical protein                                  | -1.48 | 0.04  |
| Atu5091 | <i>rcdB</i> | Curdlan synthesis protein                             | -1.47 | <0.01 |
| Atu5442 | -           | methyl-accepting chemotaxis protein                   | -1.46 | 0.03  |
| Atu1724 | -           | hypothetical protein                                  | -1.43 | 0.02  |
| Atu3975 | <i>glf</i>  | UDP-galactopyranose mutase                            | -1.34 | 0.05  |
| Atu4329 | <i>bexD</i> | polysaccharide export protein                         | -1.33 | 0.01  |
| Atu0548 | <i>flgH</i> | flagellar basal body L-ring protein                   | -1.32 | 0.01  |
| Atu4856 | -           | nucleotidyltransferase                                | -1.30 | 0.01  |
| Atu3974 | <i>ina</i>  | ice nucleation-like protein                           | -1.27 | 0.03  |
| Atu0580 | <i>fliQ</i> | flagellar biosynthesis protein FliQ                   | -1.27 | 0.03  |
| Atu4338 | <i>impF</i> | hypothetical protein                                  | -1.26 | 0.01  |
| Atu3091 | -           | hypothetical protein                                  | -1.25 | 0.05  |
| Atu3640 | -           | hypothetical protein                                  | -1.24 | 0.02  |
| Atu3321 | -           | hypothetical protein                                  | -1.23 | 0.02  |
| Atu4733 | -           | hypothetical protein                                  | -1.20 | 0.01  |
| Atu4331 | <i>impM</i> | serine/threonine phosphoprotein phosphatase           | -1.15 | 0.02  |
| Atu0544 | -           | hypothetical protein                                  | -1.15 | 0.02  |
| Atu4732 | -           | fimbrial chaperone                                    | -1.10 | 0.03  |
| Atu3639 | -           | hypothetical protein                                  | -1.09 | 0.03  |
| Atu0572 | -           | hypothetical protein                                  | -1.08 | 0.02  |
| Atu0916 | <i>ros</i>  | transcriptional regulator                             | -1.07 | 0.02  |
| Atu4335 | <i>impl</i> | putative forkhead-type phosphopeptide-binding protein | -1.02 | 0.02  |
| Atu2617 | <i>cheW</i> | chemotaxis protein                                    | -1.01 | 0.02  |
| Atu0984 | <i>pepN</i> | aminopeptidase N                                      | -0.96 | 0.04  |
| Atu0523 | <i>fliF</i> | flagellar MS-ring protein                             | -0.93 | 0.03  |
| Atu4058 | <i>exoW</i> | succinoglycan biosynthesis protein                    | -0.85 | 0.04  |

**Table S2. Genes increased in the  $\Delta visR$  mutant as determined by DNA microarray expression profiling ( $\log_2 FC > 0.6$ ,  $P < 0.05$ )**

| Gene ID | Gene        | Product                               | $\log_2 FC$ | P value |
|---------|-------------|---------------------------------------|-------------|---------|
| Atu3318 | -           | LuxR family transcriptional regulator | 2.70        | <0.01   |
| Atu3384 | -           | hypothetical protein                  | 2.10        | 0.01    |
| Atu4454 | -           | RpiR family transcriptional regulator | 1.86        | 0.02    |
| Atu1691 | -           | GGDEF family protein (DGC2)           | 1.67        | 0.04    |
| Atu3419 | -           | hippurate hydrolase                   | 1.64        | 0.02    |
| Atu3426 | -           | putative sulfonate monooxygenase      | 1.55        | 0.03    |
| Atu2707 | <i>rzcA</i> | rhizobiocin                           | 1.54        | 0.02    |
| Atu0204 | -           | hypothetical protein                  | 1.45        | 0.02    |
| Atu3094 | <i>mcpA</i> | methyl-accepting chemotaxis protein   | 1.23        | 0.02    |
| Atu3315 | <i>galE</i> | UDP-glucose 4-epimerase               | 1.14        | 0.03    |
| Atu0203 | -           | hypothetical protein                  | 1.13        | 0.02    |
| Atu3842 | -           | hypothetical protein                  | 1.01        | 0.04    |
| Atu0681 | -           | hypothetical protein                  | 0.99        | 0.03    |
| Atu3644 | -           | hypothetical protein                  | 0.95        | 0.04    |
| Atu2179 | -           | GGDEF family protein (DgcC)           | 0.91        | 0.60*   |
| Atu0824 | -           | hypothetical protein                  | 0.87        | 0.05    |

\* Although the P value of *dgcC* is larger than 0.05,  $\beta$  gal assay confirmed that *dgcC* was upregulated in the  $\Delta visR$  mutant (Fig. 8B).

**Table S3**  
**Strains and plasmids**

| Strain/plasmid                 | Relevant features                                                                            | Reference                        |
|--------------------------------|----------------------------------------------------------------------------------------------|----------------------------------|
| <i>E. coli</i>                 |                                                                                              |                                  |
| DH5 $\alpha$ / $\lambda$ pir   | $\lambda$ pir ; cloning strain                                                               | (Chiang & Rubin, 2002)           |
| TOP10 F'                       | Cloning strain                                                                               | Invitrogen                       |
| S17-1/ $\lambda$ pir           | $\lambda$ pir ; Tra <sup>+</sup> , cloning host                                              | (Kalogeraki & Winans, 1997)      |
| S17-1/ $\lambda$ pir<br>(pFD1) | <i>Himar1</i> conjugal donor                                                                 | (Lampe <i>et al.</i> , 1999)     |
| <i>A. tumefaciens</i>          |                                                                                              |                                  |
| C58                            | Nopaline type strain; pTiC58; pAtC58                                                         | (Watson <i>et al.</i> , 1975)    |
| JX100                          | $\Delta$ crdS ( $\Delta$ Atu3055-3057)                                                       | (Xu <i>et al.</i> , 2012)        |
| JX101                          | $\Delta$ chvAB ( $\Delta$ Atu2728-2730)                                                      | (Xu <i>et al.</i> , 2012)        |
| JX102                          | $\Delta$ cel ( $\Delta$ Atu3302-8187)                                                        | (Xu <i>et al.</i> , 2012)        |
| PMM26                          | $\Delta$ upp ( $\Delta$ Atu1235-1240)                                                        | (Xu <i>et al.</i> , 2012)        |
| MLL2 A                         | $\Delta$ exoA ( $\Delta$ Atu4053)                                                            | (Tomlinson <i>et al.</i> , 2010) |
| JX103                          | $\Delta$ crdS $\Delta$ exoA                                                                  | (Xu <i>et al.</i> , 2012)        |
| JX104                          | $\Delta$ chvAB $\Delta$ upp                                                                  | This study                       |
| JX105                          | $\Delta$ cel $\Delta$ upp                                                                    | This study                       |
| JX106                          | $\Delta$ crdS $\Delta$ exoA $\Delta$ upp                                                     | This study                       |
| JX107                          | $\Delta$ crdS $\Delta$ upp                                                                   | This study                       |
| JX108                          | $\Delta$ crdS $\Delta$ cel $\Delta$ exoA                                                     | (Xu <i>et al.</i> , 2012)        |
| JX109                          | $\Delta$ crdS $\Delta$ cel $\Delta$ exoA $\Delta$ upp                                        | This study                       |
| JX110                          | $\Delta$ crdS $\Delta$ cel $\Delta$ exoA $\Delta$ chvAB (EPS <sup>-</sup> UPP <sup>+</sup> ) | (Xu <i>et al.</i> , 2012)        |
| JX111                          | $\Delta$ crdS $\Delta$ cel $\Delta$ exoA $\Delta$ chvAB $\Delta$ upp                         | This study                       |
| JX117                          | $\Delta$ visR ( $\Delta$ Atu0525)                                                            | This study                       |
| JX119                          | $\Delta$ visN ( $\Delta$ Atu0524)                                                            | This study                       |
| JX120                          | EPS <sup>-</sup> UPP <sup>+</sup> $\Delta$ visR                                              | This study                       |
| JX118                          | EPS <sup>-</sup> UPP <sup>+</sup> $\Delta$ visN                                              | This study                       |
| JX134                          | $\Delta$ visR $\Delta$ cel                                                                   | This study                       |
| JX131                          | $\Delta$ visR $\Delta$ upp                                                                   | This study                       |
| JX135                          | $\Delta$ visR $\Delta$ cel $\Delta$ upp                                                      | This study                       |
| JX125                          | $\Delta$ dgcA ( $\Delta$ Atu1257)                                                            | This study                       |
| JX187                          | $\Delta$ dgcB ( $\Delta$ Atu1691)                                                            | This study                       |
| YW010                          | $\Delta$ dgcC ( $\Delta$ Atu2179)                                                            | This study                       |
| JX127                          | EPS <sup>-</sup> UPP <sup>+</sup> $\Delta$ dgcA                                              | This study                       |
| JX128                          | EPS <sup>-</sup> UPP <sup>+</sup> $\Delta$ visR $\Delta$ dgcA                                | This study                       |
| JX126                          | $\Delta$ visR $\Delta$ dgcA                                                                  | This study                       |
| JX191                          | $\Delta$ visR $\Delta$ dgcB                                                                  | This study                       |
| JX178                          | $\Delta$ visR $\Delta$ dgcC                                                                  | This study                       |
| JX779                          | $\Delta$ visR $\Delta$ dgcA $\Delta$ dgcB                                                    | This study                       |
| JX188                          | $\Delta$ visR $\Delta$ dgcB $\Delta$ dgcC                                                    | This study                       |
| JX192                          | $\Delta$ visR $\Delta$ dgcA $\Delta$ dgcB $\Delta$ dgcC                                      | This study                       |
| JX001                          | EPS <sup>-</sup> UPP <sup>+</sup> $\Delta$ visR <i>uppE</i> (Atu1236)::Mn                    | This study                       |
| JX138                          | $\Delta$ Atu3495                                                                             | This study                       |
| JX153                          | EPS <sup>-</sup> UPP <sup>+</sup> $\Delta$ Atu3495                                           | This study                       |
| Plasmids                       |                                                                                              |                                  |
| pGEM-T easy                    | PCR cloning vector; Ap <sup>R</sup>                                                          | Promega                          |

|                    |                                                                                                                                                      |                                                 |
|--------------------|------------------------------------------------------------------------------------------------------------------------------------------------------|-------------------------------------------------|
| pNPTS138<br>pSRKGm | ColE1 suicide plasmid; <i>sacB</i> ; Km <sup>R</sup><br>Broad host range <i>P<sub>lac</sub></i> expression<br>vector; <i>lacI</i> Q; Gm <sup>R</sup> | gift of M. Alley<br>(Khan <i>et al.</i> , 2008) |
| pSRKKm             | Broad host range <i>P<sub>lac</sub></i> expression<br>vector; <i>lacI</i> Q; Km <sup>R</sup>                                                         | (Khan <i>et al.</i> , 2008)                     |
| pRA301             | Broad host range; promoterless <i>lacZ</i> ;<br>Spc <sup>R</sup>                                                                                     | (Akakura & Winans, 2002)                        |
| pJX106             | pNPTS138 carrying <i>visR</i> SOE<br>deletion fragment; Km <sup>R</sup>                                                                              | This study                                      |
| pJX108             | pNPTS138 carrying <i>visN</i> SOE<br>deletion fragment; Km <sup>R</sup>                                                                              | This study                                      |
| pJX102             | pNPTS138 carrying <i>cel</i> SOE deletion<br>fragment; Km <sup>R</sup>                                                                               | This study                                      |
| pJX123             | pNPTS138 carrying <i>dgcA</i> SOE<br>deletion fragment; Km <sup>R</sup>                                                                              | This study                                      |
| pJX802             | pNPTS138 carrying <i>dgcB</i> SOE<br>deletion fragment; Km <sup>R</sup>                                                                              | This study                                      |
| pYW010             | pNPTS138 carrying <i>dgcC</i> SOE<br>deletion fragment; Km <sup>R</sup>                                                                              | This study                                      |
| pJX133             | pNPTS138 carrying <i>Atu3495</i> SOE<br>deletion fragment; Km <sup>R</sup>                                                                           | This study                                      |
| pJX109             | pSRKGm carrying <i>P<sub>lac</sub>-visR</i> ; Gm <sup>R</sup>                                                                                        | This study                                      |
| pJX124             | pSRKGm carrying <i>P<sub>lac</sub>-visN</i> ; Gm <sup>R</sup>                                                                                        | This study                                      |
| pJX136             | pSRKGm carrying <i>P<sub>lac</sub>-visNR</i> ; Gm <sup>R</sup>                                                                                       | This study                                      |
| pJX125             | pSRKGm carrying <i>P<sub>lac</sub>-dgcA</i> ; Gm <sup>R</sup>                                                                                        | This study                                      |
| pJX520             | pSRKGm carrying <i>P<sub>lac</sub>-dgcB</i> ; Gm <sup>R</sup>                                                                                        | This study                                      |
| pYW007             | pSRKGm carrying <i>P<sub>lac</sub>-dgcC</i> ; Km <sup>R</sup>                                                                                        | This study                                      |
| pJW110             | pSRKKm carrying <i>P<sub>lac</sub>-pleD</i> ; Km <sup>R</sup>                                                                                        | This study                                      |
| pJX522             | pSRKGm carrying <i>P<sub>lac</sub>-dgcA*</i> ; Gm <sup>R</sup>                                                                                       | This study                                      |
| pJX521             | pSRKGm carrying <i>P<sub>lac</sub>-dgcB*</i> ; Gm <sup>R</sup>                                                                                       | This study                                      |
| pJX611             | pSRKGm carrying <i>P<sub>lac</sub>-dgcC*</i> ; Gm <sup>R</sup>                                                                                       | This study                                      |
| pJX612             | pSRKGm carrying <i>P<sub>lac</sub>-pleD*</i> ; Gm <sup>R</sup>                                                                                       | This study                                      |
| pJW168             | pSRKGm carrying <i>P<sub>lac</sub>-Atu3495</i> ; Gm <sup>R</sup>                                                                                     | This study                                      |
| pJX613             | pRA301 carrying <i>PdgcA-lacZ</i> ; Spc <sup>R</sup>                                                                                                 | This study                                      |
| pJX162             | pRA301 carrying <i>PdgcB-lacZ</i> ; Spc <sup>R</sup>                                                                                                 | This study                                      |
| pJX163             | pRA301 carrying <i>PdgcC-lacZ</i> ; Spc <sup>R</sup>                                                                                                 | This study                                      |
| pJX158             | pRA301 carrying <i>PAtu3318-lacZ</i> ;<br>Spc <sup>R</sup>                                                                                           | This study                                      |
| pJX160             | pRA301 carrying <i>P-flgE (Atu0574)-<br/>lacZ</i> ; Spc <sup>R</sup>                                                                                 | This study                                      |
| pJX159             | pRA301 carrying <i>P-rem (Atu0573)-<br/>lacZ</i> ; Spc <sup>R</sup>                                                                                  | This study                                      |
| pJX166             | pRA301 carrying <i>P-motA (Atu0560)-<br/>lacZ</i> ; Spc <sup>R</sup>                                                                                 | This study                                      |

<sup>a</sup> All *A. tumefaciens* strains are C58 derivatives

**Table S4. Oligonucleotides**

| <b>Primer</b>        | <b>Sequence</b>                                        |
|----------------------|--------------------------------------------------------|
| <i>visR</i> -P1      | (Spe I) ggtacc <b>actagt</b> AAATGGAGAAGTGCCTTTTCGCTGC |
| <i>visR</i> -P2      | <i>aagctt</i> ggtaccgaattcCTGTACCATCCGTCCGACCAT        |
| <i>visR</i> -P3      | <i>gaattc</i> ggtaccaagcttTACATCCATTGATGGCGGACG        |
| <i>visR</i> -P4      | (Sph I) aagctt <b>gcatgc</b> ATTTACGGCATCTGTCAGCTTGC   |
| <i>visN</i> -P1      | (Spe I) ggtacc <b>actagt</b> AAATTCCGCCGGCATCATCAACTC  |
| <i>visN</i> -P2      | <i>aagctt</i> ggtaccgaattcCTTACCCATGCCCTCCAGAGGCTT     |
| <i>visN</i> -P3      | <i>gaattc</i> ggtaccaagcttGTATAATGGTTCGGACGGATGGTAC    |
| <i>visN</i> -P4      | (Sph I) aagctt <b>gcatgc</b> GCCAGCATGTCCACCATGATTTCA  |
| <i>dgcA</i> -P1      | (Spe I) <b>actagt</b> TTATCGACATGCCGCGAAACGAAC         |
| <i>dgcA</i> -P2      | <i>aagctt</i> ggtaccgaattcTGAGGATGTCACCGTACAGCG        |
| <i>dgcA</i> -P3      | <i>gaattc</i> ggtaccaagcttGCTCGTCTTTGCATCCAGCAT        |
| <i>dgcA</i> -P4      | (Sph I) <b>gcatgc</b> GCCATGGCGGTATCAACTGGATTT         |
| <i>dgcB</i> -P1      | (Spe I) agagct <b>actagt</b> TATTGGCCATTCTGATGGCCTGA   |
| <i>dgcB</i> -P2      | <i>aagctt</i> ggtaccgaattcCATCAAGAACTCCAGTGAGTCTG      |
| <i>dgcB</i> -P3      | <i>gaattc</i> ggtaccaagcttTGAAAATTAGAGGGCAGCAGCCGT     |
| <i>dgcB</i> -P4      | (Pst I) tata <b>ctgcag</b> AGCTTCGAGATGGAT             |
| <i>dgcC</i> -P1      | (Spe I) <b>actagt</b> TGCCTTACTACACGACGATG             |
| <i>dgcC</i> -P2      | <i>aagctt</i> ggtaccgaattcTAAGAAGCGGAAAAGCCTGC         |
| <i>dgcC</i> -P3      | <i>gaattc</i> ggtaccaagcttCAGCATAATATGCCCATACG         |
| <i>dgcC</i> -P4      | (Sph I) <b>gcatgc</b> AAGCTCTACGTCACCAATGC             |
| Atu3495-P1           | (Spe I) <b>actagt</b> ACGACATCCAGAGATCCTTGCGAA         |
| Atu3495-P2           | <i>aagctt</i> ggtaccgaattcTGAAACGGGCCTGTTTCGCGA        |
| Atu3495-P3           | <i>gaattc</i> ggtaccaagcttCACCGCCACAAGTTTTCGCAA        |
| Atu3495-P4           | (Sph I) <b>gcatgc</b> CAAACCGCAGGGCAAACCGATATT         |
| Com- <i>visR</i> -P1 | (Nde I) aagctt <b>catatg</b> GTCGGACGGATGGTACAG        |
| Com- <i>visR</i> -P2 | (Spe I) ggtacc <b>actagt</b> CGGGCGTTTGACCGGCTTAA      |
| Com- <i>visN</i> -P1 | (Nde I) <b>catatg</b> GGTAAGCCCTTGCCGCGC               |
| Com- <i>visN</i> -P2 | (Spe I) <b>actagt</b> GTACCATCCGTCCGACCATTATAC         |
| Com- <i>dgcA</i> -P1 | (Nde I) <b>catatg</b> CTGGATGCAAAGACGAGC               |
| Com- <i>dgcA</i> -P2 | (Sac I) <b>gagctc</b> CGCTGTACGGTGACATCCTCA            |
| Com- <i>dgcB</i> -P1 | (Nde I) ggcagc <b>catatg</b> AACACGGCATCCACG           |
| Com- <i>dgcB</i> -P2 | (Spe I) tctaga <b>actagt</b> ACGGCTGCTGCCCTCTAATTT     |
| Com- <i>dgcC</i> -P1 | (Nde I) ggcagc <b>catatg</b> CTGGGTGAACTCGACCTTGCA     |
| Com- <i>dgcC</i> -P2 | (Spe I) tctaga <b>actagt</b> CCACTGCAGATGCAGCGAAAGA    |
| Com- <i>pleD</i> -P1 | (Nde I) ggcagc <b>catATG</b> ACGGCGAGAGTTCTG           |
| Com- <i>pleD</i> -P2 | (Spe I) tctaga <b>actagt</b> AACAGTCGTGGTTAATTG        |
| Com3495-P1           | (Nde I) <b>cataTG</b> CGAAAACCTTGTGGCGGTGATCATC        |



|                   |                                                      |
|-------------------|------------------------------------------------------|
| Com3495-P2        | (Xba I) <i>ggtctaga</i> TCAGACCGAACTCCAAGCCACCAGT    |
| <i>dgcA</i> *-P1  | GTCCGGATGGGCGGCGcGGcATTTGCGCTGGTGGCC                 |
| <i>dgcA</i> *-P2  | GGCCACCAGCGCAAATgCCgCGCCGCCCATCCGGAC                 |
| <i>dgcB</i> *-P1  | GCCCCAAGCGGCGGCGcGGcATTGCGCCATCATTCTC                |
| <i>dgcB</i> *-P2  | GAGAATGATGGCGAATgCCgCGCCGCCGCTTCGGGC                 |
| <i>dgcC</i> *-P1  | GCGCGTTACGGCGGCGcGGcATTCATCATTTTCCTG                 |
| <i>dgcC</i> *-P2  | CAGGAAAATGATGAATgCCgCGCCGCCGTAACGCGC                 |
| <i>pleD</i> *-P1  | TGCCGTTATGGCGGAGcGGcATTGTCGTCGTCATG                  |
| <i>pleD</i> *-P2  | CATGACGACGACGAATgCCgCTCCGCCATAACGGCA                 |
| <i>p-motA</i> -p1 | (Kpn I) gagctc <i>ggtacc</i> TCCAGCGACTTTGCAAGCTCG   |
| <i>p-motA</i> -p2 | (Sph I) ctgcag <i>gcatgc</i> CATTGATCGACCACGCCGAA    |
| <i>p-rem</i> -p1  | (Kpn I) gagctc <i>ggtacc</i> AAATGTTGATCCGCGCCGCA    |
| <i>p-rem</i> -p2  | (Sph I) ctgcag <i>gcatgc</i> CATTGTCGTCGTCGTCGCA     |
| <i>p-flgE</i> -p1 | (Kpn I) gagctc <i>ggtacc</i> CGTCGATGATGTCGTCGCA     |
| <i>p-flgE</i> -p2 | (Sph I) ctgcag <i>gcatgc</i> CATTCAAAAACCCTCGTGGTC   |
| <i>p-dgcA</i> -p1 | (Kpn I) gagctc <i>ggtacc</i> TGTCCGTCCTTTGTCAACTCTG  |
| <i>p-dgcA</i> -p2 | (Sph I) ctgcag <i>gcatgc</i> CATTGCAAATCCTATCTGCGCC  |
| <i>p-dgcB</i> -p1 | (Kpn I) gagctc <i>ggtacc</i> TATAAGGCTGAAGCCCTGACA   |
| <i>p-dgcB</i> -p2 | (Sph I) ctgcag <i>gcatgc</i> CATCAAGAACTCCAGTGAGT    |
| <i>p-dgcC</i> -p1 | (Kpn I) gagctc <i>ggtacc</i> GTCACCAATGCCGTCAAGCAC   |
| <i>p-dgcC</i> -p2 | (Sph I) ctgcag <i>gcatgc</i> CATAATATGCCCATACGG      |
| <i>p-3318</i> -p1 | (Kpn I) gagctc <i>ggtacc</i> CGCCAAATATATATGTCGCTTGG |
| <i>p-3318</i> -p2 | (Sph I) ctgcag <i>gcatgc</i> CATTGACGCCTCCCTAAAGCG   |
| MarTDL2           | GACACGGGCCTCGANGNNCNTNGG                             |
| MarRSeq           | CGGGTATCGCTCTTGAAGGGA                                |
| MarLSeq           | GGGAATCATTTGAAGGTTGGT                                |
| MarTDR1           | CAACCGTGCGGGGNTNCNNGNCNG                             |

Upper case sequence anneals to target sequences; lower case are engineered into oligonucleotides but do not anneal with target sequences in genome

Italicized sequences are complementary among paired oligonucleotides

Engineered restriction endonuclease cleavage sites are indicated in parentheses and highlighted in yellow

## Supplemental References

- Akakura, R. & S.C. Winans, (2002) Constitutive mutations of the OccR regulatory protein affect DNA bending in response to metabolites released from plant tumors. *J Biol Chem* **277**: 5866-5874.
- Chiang, S.L. & E.J. Rubin, (2002) Construction of a mariner-based transposon for epitope-tagging and genomic targeting. *Gene* **296**: 179-185.
- Kalogeraki, V.S. & S.C. Winans, (1997) Suicide plasmids containing promoterless reporter genes can simultaneously disrupt and create fusions to target genes of diverse bacteria. *Gene* **188**: 69-75.
- Khan, S.R., J. Gaines, R.M. Roop, 2nd & S.K. Farrand, (2008) Broad-host-range expression vectors with tightly regulated promoters and their use to examine the influence of TraR and TraM expression on Ti plasmid quorum sensing. *Appl Environ Microbiol* **74**: 5053-5062.
- Lampe, D.J., B.J. Akerley, E.J. Rubin, J.J. Mekalanos & H.M. Robertson, (1999) Hyperactive transposase mutants of the *Himar1* mariner transposon. *Proc. Natl. Acad. Sci. USA* **96**: 11428-11433.
- Tomlinson, A.D., B. Ramey-Hartung, T.W. Day, P.M. Merritt & C. Fuqua, (2010) *Agrobacterium tumefaciens* ExoR represses succinoglycan biosynthesis and is required for biofilm formation and motility. *Microbiology* **156**: 2670-2681.
- Watson, B., T.C. Currier, M.P. Gordon, M.D. Chilton & E.W. Nester, (1975) Plasmid required for virulence of *Agrobacterium tumefaciens*. *J. Bacteriol.* **123**: 255-264.
- Xu, J., J. Kim, T. Danhorn, P.M. Merritt & C. Fuqua, (2012) Phosphorus limitation increases attachment in *Agrobacterium tumefaciens* and reveals a conditional functional redundancy in adhesin biosynthesis. *Res Microbiol* **163**: 674-684.

Xu et al. – Supplemental Figure 1

A

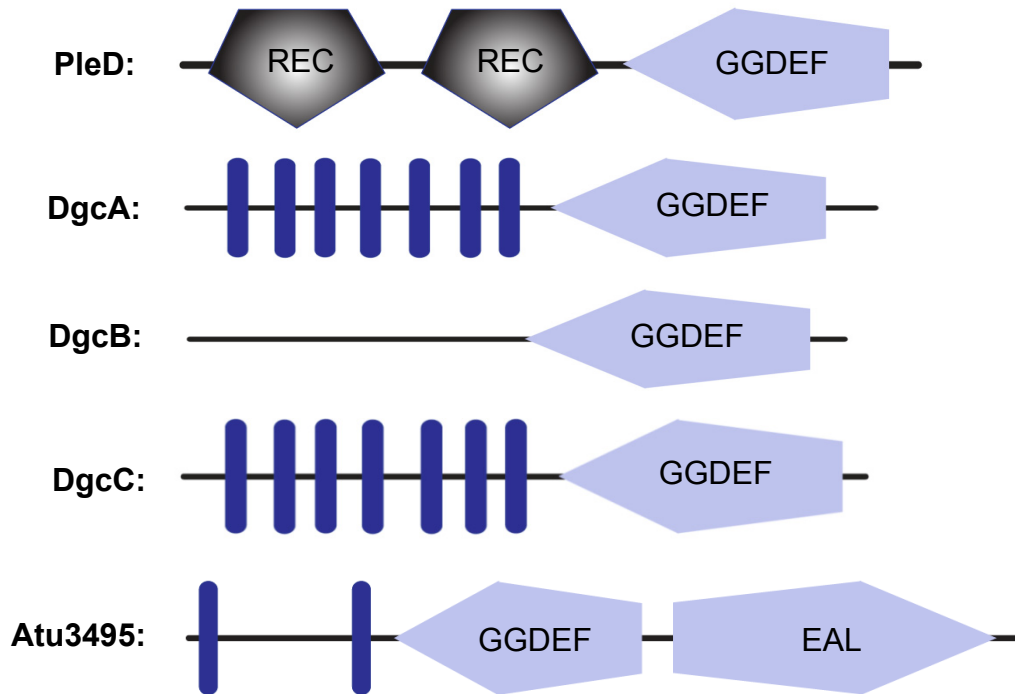

B

```

PleD: STVRGADLACRYGGEEFVVVMPDTPIELAASVAERLRAIVEDKPFYVRSIDRELSITASL
DgcA: RVIGERGLFVRMGGEEFALVAEVESPSSTVTLAEAIRSNLRLSKITAR--NEAIKVTTSV
DgcB: ANVRKDG FVARSGGEEFAIILDGNTPEEVMVMCERIRLSLESTPFRNSRSGADYGTVTIS
DgcC: GSIRGGDVLARYGGEEFIIFLPGAGVDKACMIGERIRDAVAINEVDCG--GLRVGVTISI
Atu3495: AIGGDYDMVCRLGGDEFVAVSDDLNEDAARRLSTKLIDQISR TYQLGE---QEVKIGTCI
      .. * **:** .. . . : : : .
    
```

Xu et al. – Supplemental Figure 2

A

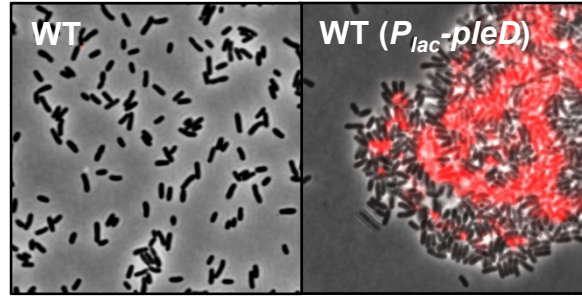

B

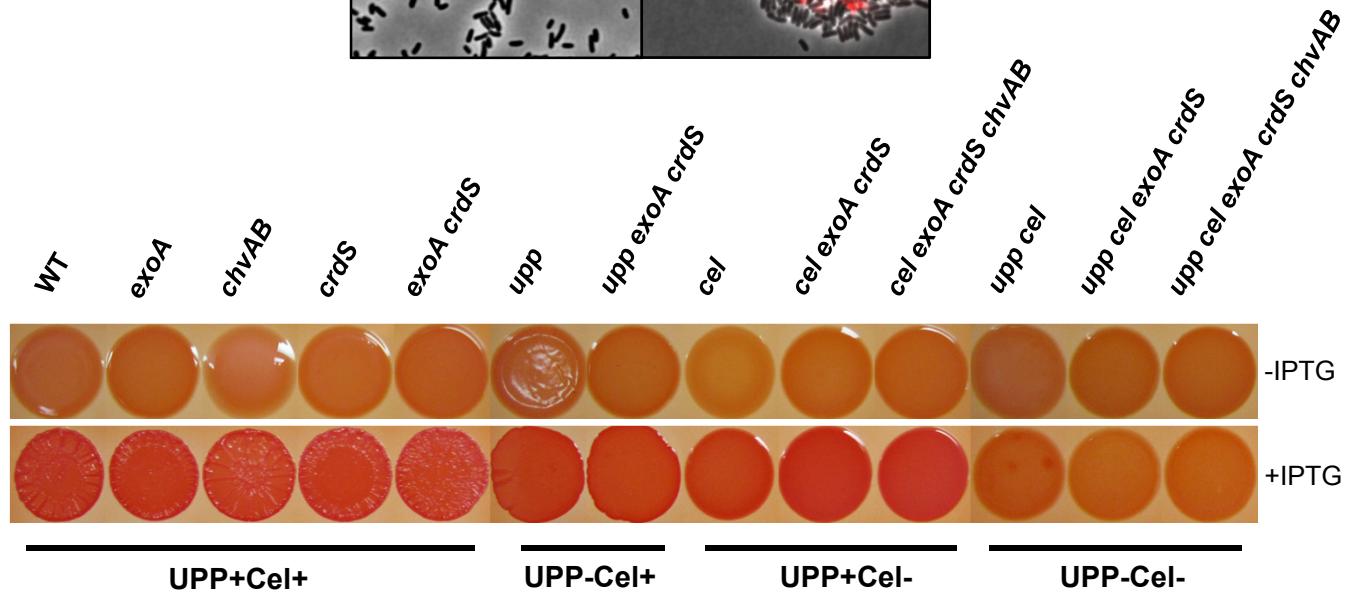

Xu et al. – Supplemental Figure 3

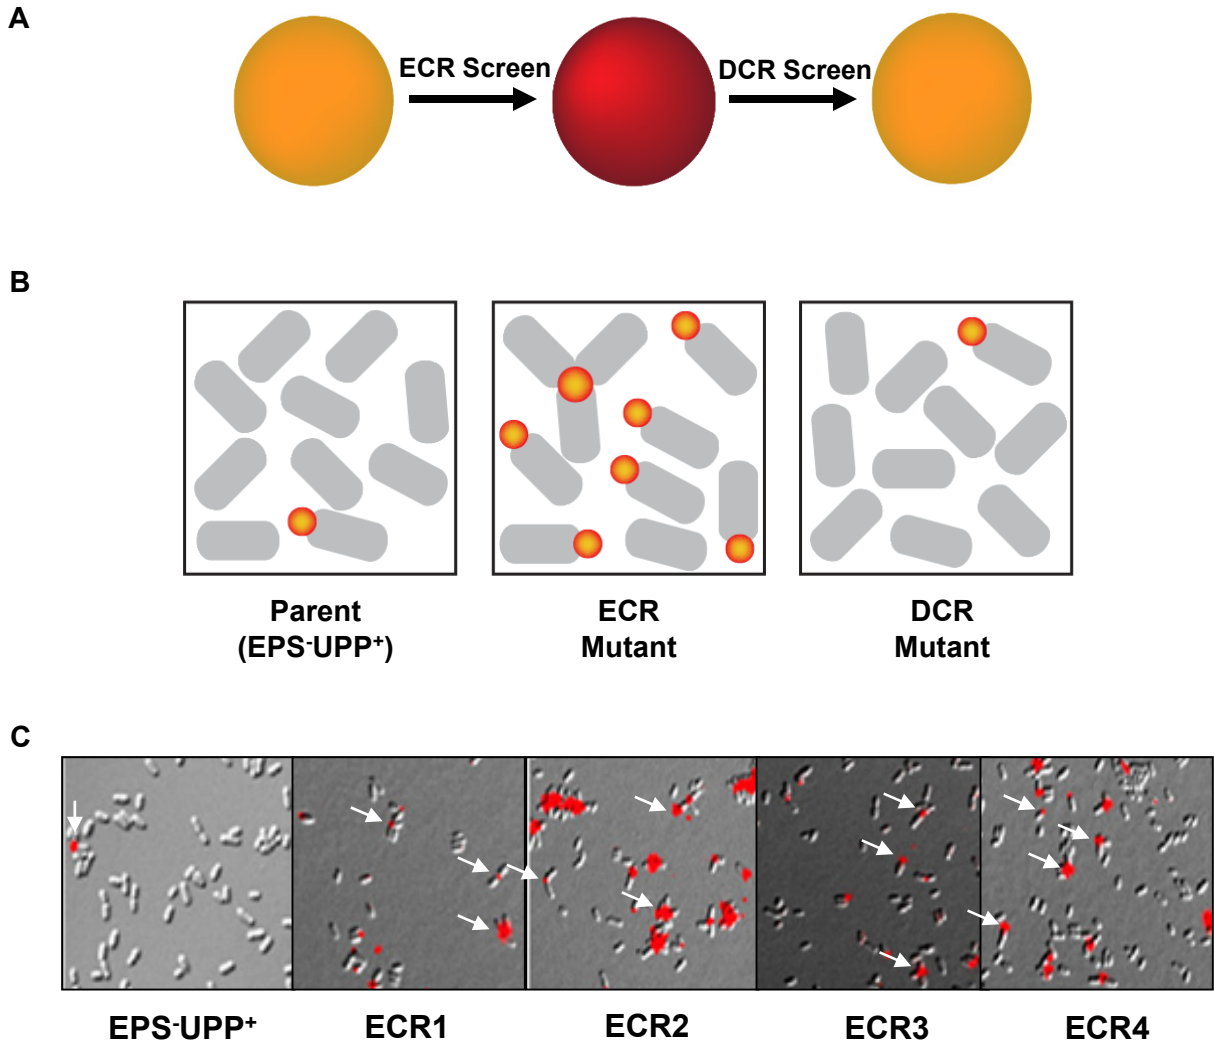

Xu et al. – Supplemental Figure 4

A

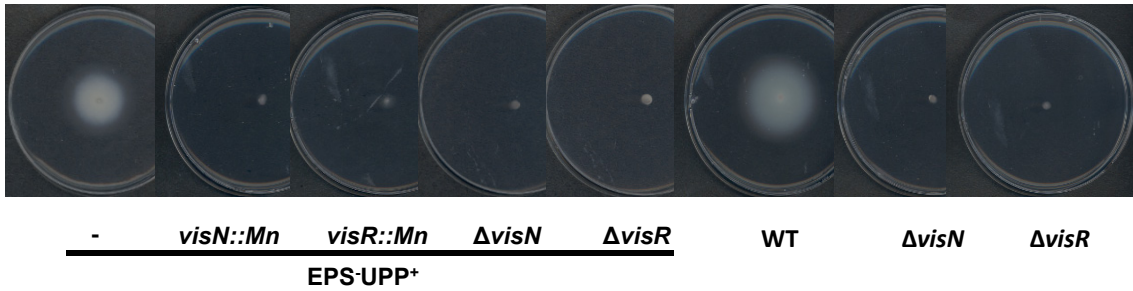

B

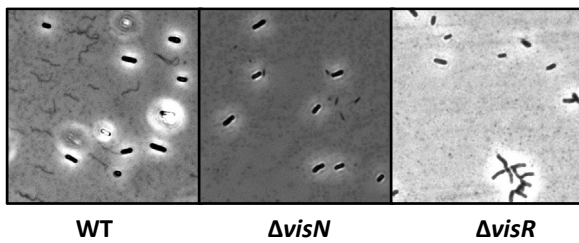

C

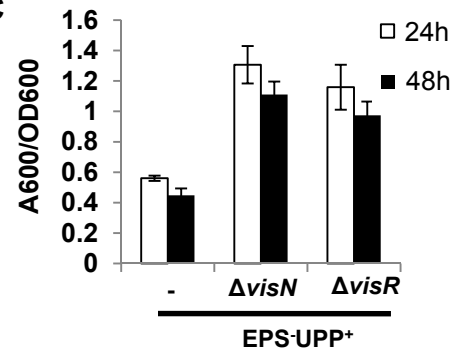

D

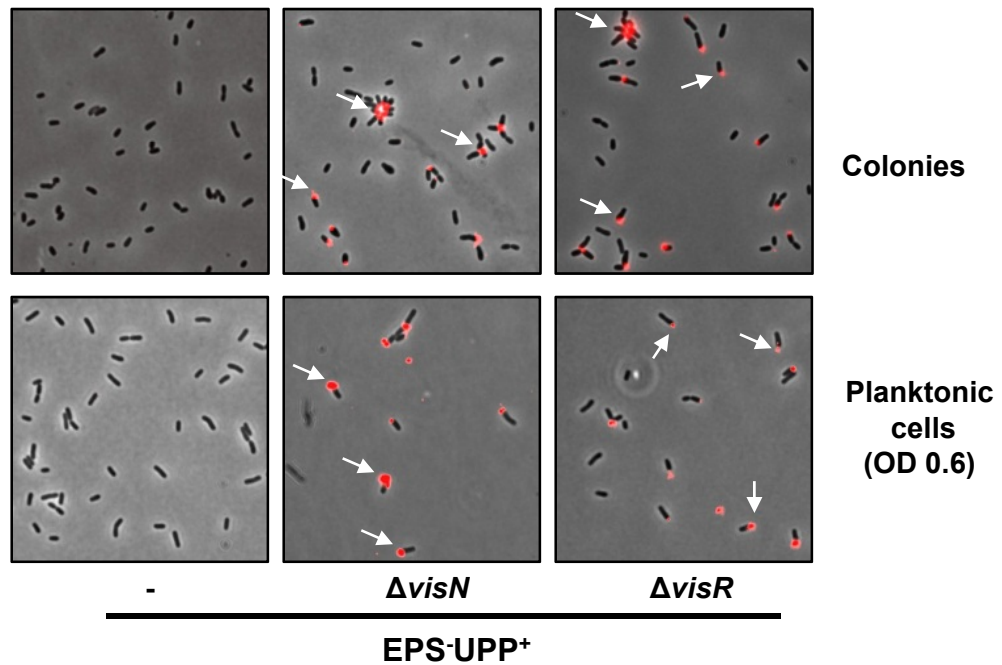

Xu et al. – Supplemental Figure 5

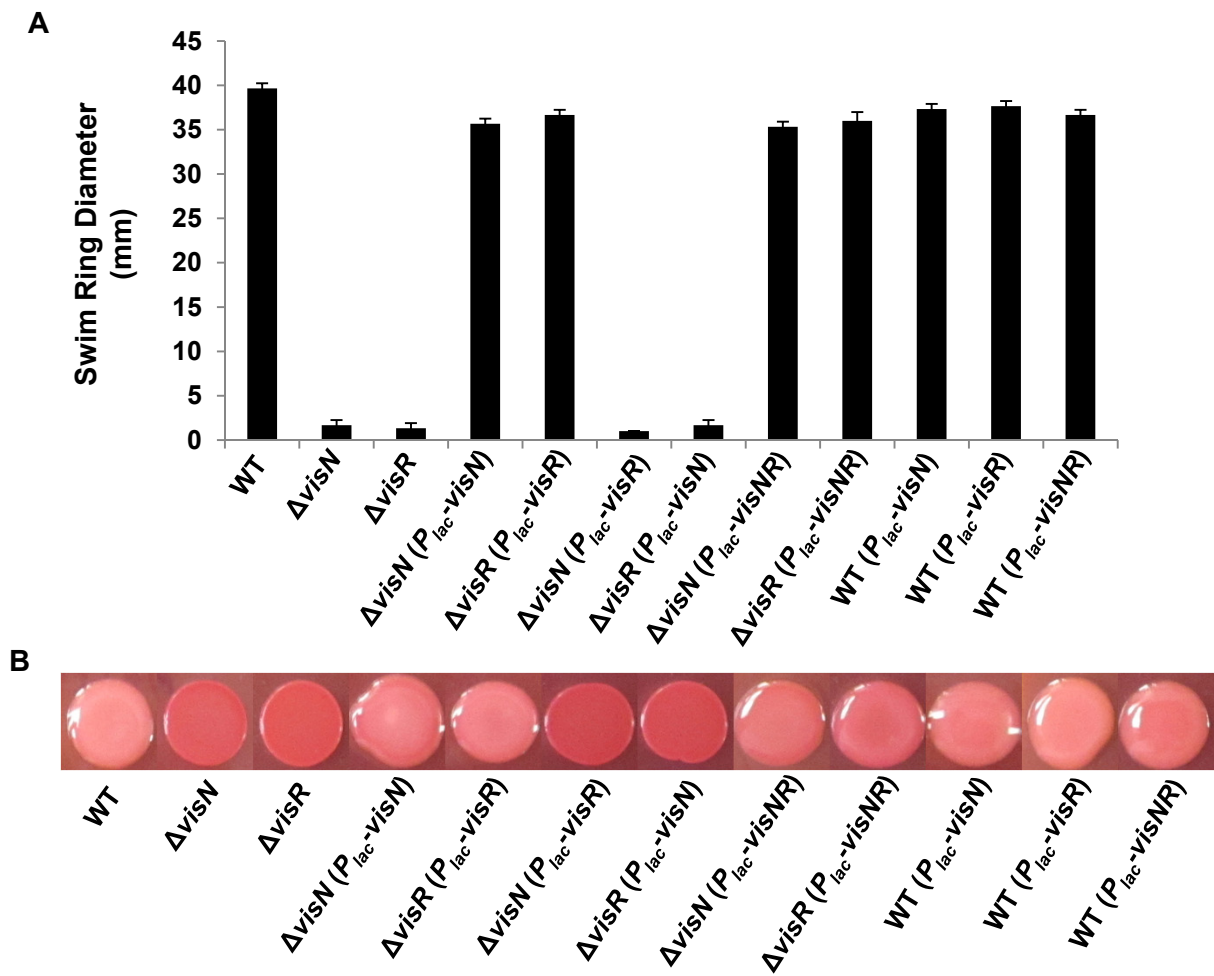

Xu et al. – Supplemental Figure 6

**A**

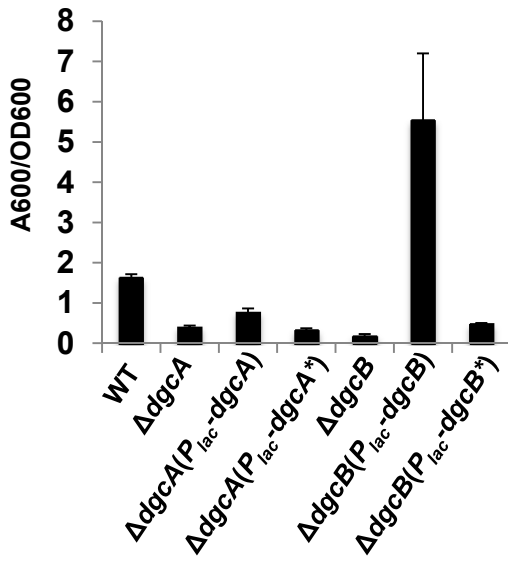

**B**

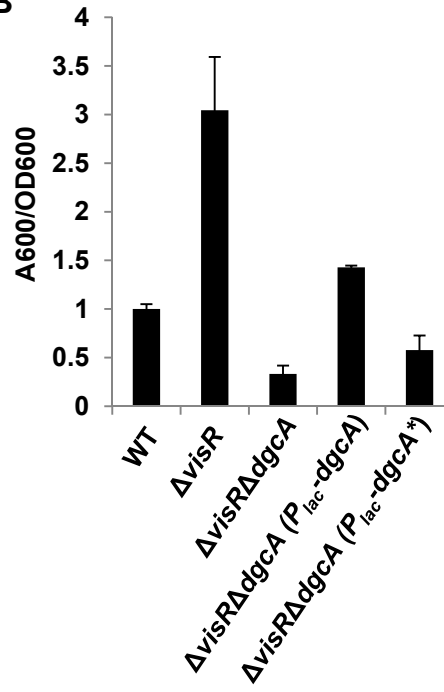

**C**

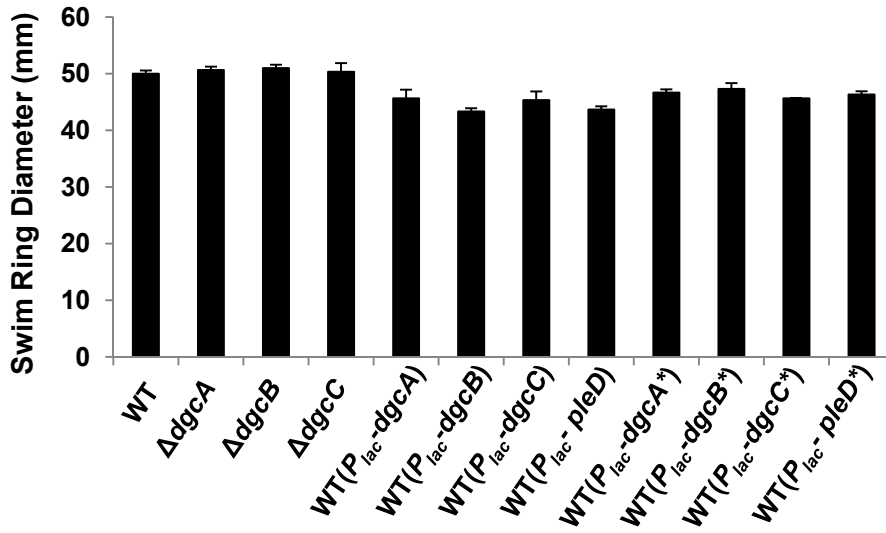

**D**

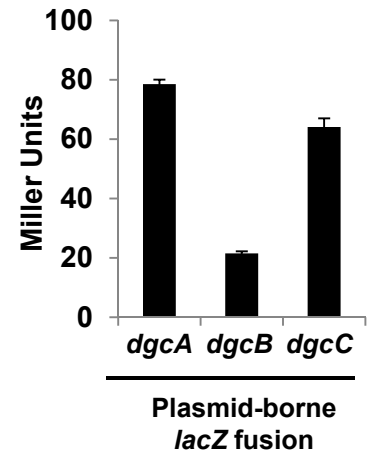

Supplement: NIHMS503034-supplement-Supp_Table_S1-S4___Figure_S1-S6.pdf [file NIHMS503034-supplement-Supp_Table_S1-S4___Figure_S1-S6.pdf]
